# Supplementary material
Source: PubMed Central journal article supplement (PMC6192701)
Supplement: NIHMS1508822-supplement-1.pdf [file NIHMS1508822-supplement-1.pdf]

**Appendix**  
**Health-related Quality of Life Among Black Sexual Minority Women**  
**Yette and Ahern**

**States included**

Alaska  
Colorado  
Delaware  
Hawaii  
Idaho  
Indiana  
Kansas  
Maryland  
Massachusetts  
Michigan  
Minnesota  
Nevada  
New Mexico  
New York  
North Carolina  
Ohio  
Pennsylvania  
Virginia  
Washington  
Wisconsin

**Appendix**  
**Health-related Quality of Life Among Black Sexual Minority Women**  
**Yette and Ahern**

**Appendix Table 1.** Number and Weighted Proportions: Demographics and HRQOL - BRFSS, Selected U.S. States, 2014 and 2015

| Variable                       | Black          |                |                   | White            |                  |                    |
|--------------------------------|----------------|----------------|-------------------|------------------|------------------|--------------------|
|                                | Lesbian        | Bisexual       | Heterosexual      | Lesbian          | Bisexual         | Heterosexual       |
|                                | n=150<br>n (%) | n=213<br>n (%) | n=12,464<br>n (%) | n=1,598<br>n (%) | n=1,969<br>n (%) | n=138,601<br>n (%) |
| <b>Age</b>                     |                |                |                   |                  |                  |                    |
| 18–24                          | 18 (29.4)      | 50 (39.7)      | 639 (13.1)        | 110 (18.8)       | 358 (34.9)       | 4,194 (9.1)        |
| 25–34                          | 39 (29.3)      | 60 (32.7)      | 1,309 (17.0)      | 133 (15.0)       | 437 (30.4)       | 9,352 (12.8)       |
| 35–44                          | 26 (11.3)      | 39 (14.8)      | 1,737 (18.1)      | 182 (16.6)       | 316 (14.0)       | 14,387 (14.5)      |
| 45–54                          | 33 (17.8)      | 23 (5.0)       | 2,419 (18.4)      | 383 (22.4)       | 272 (8.9)        | 22,937 (19.0)      |
| 55–64                          | 23 (8.4)       | 20 (3.1)       | 3,040 (17.3)      | 467 (17.1)       | 278 (6.1)        | 33,818 (19.4)      |
| ≥65                            | 11 (3.7)       | 21 (4.7)       | 3,320 (16.2)      | 323 (10.1)       | 308 (5.8)        | 53,913 (25.3)      |
| <b>Education</b>               |                |                |                   |                  |                  |                    |
| <High school                   | 13 (11.8)      | 23 (20.1)      | 1,015 (12.3)      | 34 (6.1)         | 109 (11.7)       | 5,506 (7.3)        |
| High school                    | 39 (28.5)      | 62 (33.7)      | 3,581 (29.6)      | 252 (21.8)       | 446 (26.5)       | 36,516 (28.3)      |
| Some college or tech school    | 48 (39)        | 69 (31.3)      | 3,905 (36.1)      | 359 (31.0)       | 658 (39.5)       | 40,578 (33.8)      |
| College degree                 | 50 (20.7)      | 59 (14.9)      | 3,934 (21.9)      | 952 (41.0)       | 755 (22.3)       | 55,763 (30.4)      |
| Refused                        | 0 (0)          | 0 (0)          | 29 (0.2)          | 1 (0.2)          | 1 (0)            | 238 (0.2)          |
| <b>Relationship status</b>     |                |                |                   |                  |                  |                    |
| Married                        | 25 (11.4)      | 32 (10.1)      | 3,612 (28.1)      | 505 (26.4)       | 649 (26.6)       | 75,603 (57.5)      |
| Divorced                       | 18 (9.1)       | 19 (3.5)       | 2,438 (13.8)      | 179 (9.6)        | 337 (11.0)       | 20,655 (11.6)      |
| Widowed                        | 2 (0.7)        | 11 (2.1)       | 1,842 (9.5)       | 48 (1.6)         | 141 (2.9)        | 24,010 (10.8)      |
| Separated                      | 3 (2.4)        | 11 (3.4)       | 626 (4.8)         | 22 (1.5)         | 61 (3.4)         | 1,890 (1.5)        |
| Never married                  | 93 (73.2)      | 123 (74.3)     | 3,626 (40.1)      | 526 (39.5)       | 589 (43.6)       | 13,250 (15.3)      |
| Member of an unmarried couple  | 9 (3.3)        | 15 (4.3)       | 235 (3.0)         | 304 (20.7)       | 187 (12.2)       | 2,636 (2.9)        |
| Refused                        | 0 (0)          | 2 (2.4)        | 85 (0.5)          | 14 (0.7)         | 5 (0.3)          | 547 (0.3)          |
| Missing                        | 0 (0)          | 0 (0)          | 0 (0)             | 0 (0)            | 0 (0)            | 10 (0)             |
| <b>HRQOL measures</b>          |                |                |                   |                  |                  |                    |
| Fair or poor self-rated health | 36 (22.9)      | 59 (29.2)      | 2,901 (20.7)      | 243 (13.0)       | 397 (21.1)       | 20,365 (14.0)      |
| Frequent poor physical health  | 23 (16.6)      | 35 (21.1)      | 1,781 (12.1)      | 233 (11.6)       | 348 (18.0)       | 17,845 (12.4)      |
| Frequent poor mental health    | 30 (21.3)      | 51 (27.8)      | 1,497 (13.7)      | 234 (17.6)       | 475 (28.4)       | 14,230 (12.2)      |
| Frequent unhealthy days        | 39 (28.3)      | 75 (41.5)      | 2,776 (22.2)      | 402 (26.1)       | 679 (40.3)       | 27,563 (21.1)      |
| Frequent activity limitation   | 25 (19.7)      | 22 (14.7)      | 1,223 (9.0)       | 185 (11.1)       | 264 (15.1)       | 11,328 (8.2)       |
| 7+ days poor physical health   | 34 (31.9)      | 51 (28.9)      | 2,512 (18.2)      | 317 (17.3)       | 478 (26.3)       | 24,464 (17.3)      |
| 7+ days poor mental health     | 39 (27.3)      | 73 (36.5)      | 2,183 (19.9)      | 330 (24.9)       | 677 (42.1)       | 20,716 (17.7)      |
| 7+ unhealthy days              | 52 (45.0)      | 97 (51.5)      | 3,903 (31.9)      | 559 (38.0)       | 918 (53.1)       | 38,390 (29.9)      |
| 7+ days activity limitation    | 32 (24.2)      | 38 (20.9)      | 1,685 (13.0)      | 257 (15.1)       | 382 (20.7)       | 15,685 (11.5)      |

BRFSS, Behavioral Risk Factor Surveillance System; HRQOL, health-related quality of life

**Appendix**  
**Health-related Quality of Life Among Black Sexual Minority Women**  
**Yette and Ahern**

**Appendix Table 2.** Age-adjusted HRQOL Prevalence Differences - BRFSS, Selected U.S. States, 2014 and 2015

| <b>HRQOL measure</b>                                                           | <b>PD (95% CI)</b>          | <b>PD (95% CI)</b>          | <b>PD (95% CI)</b>          |
|--------------------------------------------------------------------------------|-----------------------------|-----------------------------|-----------------------------|
| <b>Black lesbian women compared to</b>                                         | <b>Black heterosexual</b>   | <b>White lesbian</b>        | <b>White heterosexual</b>   |
| Fair or poor self-rated health                                                 | 0.142 (−0.016, 0.299)       | <b>0.227 (0.104, 0.351)</b> | <b>0.273 (0.073, 0.472)</b> |
| Frequent poor physical health                                                  | 0.024 (−0.075, 0.123)       | 0.051 (−0.034, 0.137)       | 0.024 (−0.091, 0.140)       |
| Frequent poor mental health                                                    | 0.083 (−0.017, 0.183)       | 0.078 (−0.010, 0.166)       | 0.084 (−0.032, 0.199)       |
| Frequent unhealthy days                                                        | 0.033 (−0.072, 0.138)       | 0.038 (−0.054, 0.131)       | 0.027 (−0.092, 0.146)       |
| Frequent activity limitation                                                   | 0.092 (−0.009, 0.192)       | 0.096 (−0.008, 0.183)       | 0.090 (−0.028, 0.207)       |
| 7+ days poor physical health                                                   | <b>0.165 (0.001, 0.328)</b> | <b>0.166 (0.038, 0.294)</b> | <b>0.220 (0.008, 0.432)</b> |
| 7+ days poor mental health                                                     | 0.042 (−0.059, 0.142)       | 0.034 (−0.056, 0.124)       | 0.047 (−0.068, 0.163)       |
| 7+ unhealthy days                                                              | 0.129 (−0.030, 0.288)       | 0.088 (−0.040, 0.215)       | 0.183 (−0.023, 0.389)       |
| 7+ days activity limitation                                                    | 0.132 (−0.008, 0.271)       | <b>0.133 (0.024, 0.241)</b> | 0.152 (−0.022, 0.326)       |
| <b>Black bisexual women compared to</b>                                        | <b>Black heterosexual</b>   | <b>White bisexual</b>       | <b>White heterosexual</b>   |
| Fair or poor self-rated health                                                 | 0.035 (−0.071, 0.142)       | 0.070 (−0.017, 0.157)       | 0.095 (−0.014, 0.204)       |
| Frequent poor physical health                                                  | 0.021 (−0.064, 0.106)       | −0.006 (−0.078, 0.067)      | 0.031 (−0.062, 0.125)       |
| Frequent poor mental health                                                    | 0.058 (−0.028, 0.143)       | −0.023 (−0.099, 0.053)      | 0.050 (−0.040, 0.140)       |
| Frequent unhealthy days                                                        | <b>0.118 (0.009, 0.228)</b> | 0.005 (−0.081, 0.091)       | <b>0.133 (0.008, 0.259)</b> |
| Frequent activity limitation                                                   | 0.042 (−0.045, 0.129)       | −0.001 (−0.074, 0.072)      | 0.045 (−0.047, 0.136)       |
| 7+ days poor physical health                                                   | 0.081 (−0.028, 0.190)       | 0.020 (−0.065, 0.106)       | 0.110 (−0.015, 0.234)       |
| 7+ days poor mental health                                                     | <b>0.107 (0.008, 0.206)</b> | −0.036 (−0.120, 0.047)      | <b>0.116 (0.006, 0.227)</b> |
| 7+ unhealthy days                                                              | 0.054 (−0.059, 0.167)       | −0.041 (−0.129, 0.047)      | 0.077 (−0.050, 0.203)       |
| 7+ days activity limitation                                                    | 0.092 (−0.020, 0.203)       | 0.030 (−0.053, 0.113)       | 0.113 (−0.013, 0.239)       |
| <b>Black sexual minority women (combined lesbian and bisexual) compared to</b> | <b>Black heterosexual</b>   | <b>White SMW</b>            | <b>White heterosexual</b>   |
| Fair or poor self-rated health                                                 | 0.067 (−0.022, 0.155)       | <b>0.122 (0.046, 0.198)</b> | <b>0.145 (0.035, 0.255)</b> |
| Frequent poor physical health                                                  | 0.032 (−0.033, 0.097)       | N/A <sup>a</sup>            | 0.037 (−0.033, 0.107)       |
| Frequent poor mental health                                                    | <b>0.079 (0.017, 0.140)</b> | N/A <sup>a</sup>            | <b>0.071 (0.009, 0.132)</b> |
| Frequent unhealthy days                                                        | <b>0.095 (0.014, 0.179)</b> | N/A <sup>a</sup>            | <b>0.100 (0.006, 0.195)</b> |
| Frequent activity limitation                                                   | <b>0.071 (0.008, 0.133)</b> | N/A <sup>a</sup>            | <b>0.070 (0.005, 0.135)</b> |
| 7+ days poor physical health                                                   | <b>0.101 (0.009, 0.193)</b> | <b>0.078 (0.000, 0.155)</b> | <b>0.134 (0.018, 0.251)</b> |
| 7+ days poor mental health                                                     | <b>0.085 (0.008, 0.162)</b> | N/A <sup>a</sup>            | <b>0.091 (0.008, 0.173)</b> |
| 7+ unhealthy days                                                              | 0.080 (−0.013, 0.172)       | N/A <sup>a</sup>            | 0.107 (−0.011, 0.224)       |
| 7+ days activity limitation                                                    | <b>0.118 (0.036, 0.201)</b> | <b>0.079 (0.012, 0.145)</b> | <b>0.136 (0.041, 0.231)</b> |

<sup>a</sup>Estimates for lesbian and bisexual women were in different directions. Boldface indicates statistical significance ( $p < 0.05$ ). Age-adjusted using age categories: 18–24, 25–34, 35–44, 45–54, 55–64,  $\geq 65$  years.

BRFSS, Behavioral Risk Factor Surveillance System; HRQOL, health-related quality of life; SMW, sexual minority women; PD, prevalence difference
